# Supplementary material for: Developing Activated Carbon Veil Electrode for Sensing Salivary Uric Acid
Source: MDPI journal article supplement (doi:10.3390/bios11080287), 2021-08-20
Supplement: s1 [file s1]

Maria A. Bukharinova, Natalia Yu. Stozhko \*, Elizaveta A. Novakovskaya, Ekaterina I. Khamzina, Aleksey V. Tarasov and Sergey V. Sokolkov

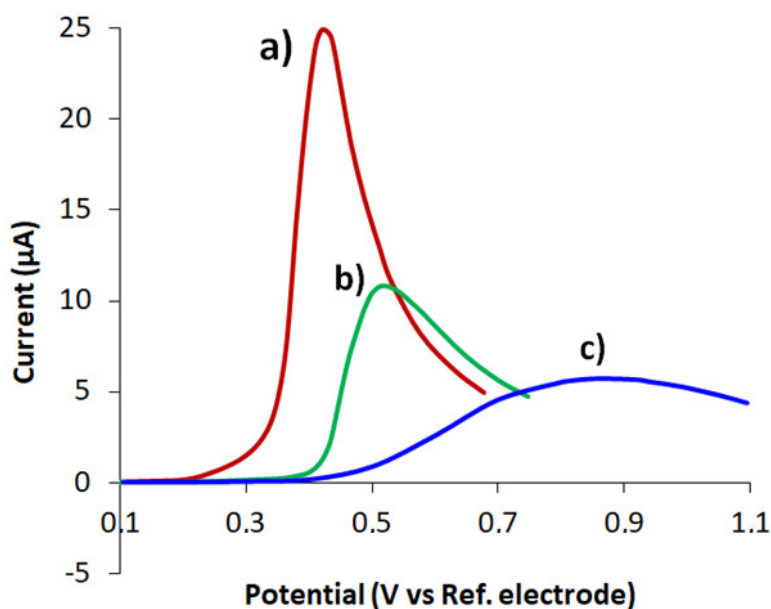

**Figure S1.** LS voltammograms of 0.1 mM UA for the CVE activated at 2.0 V (a), Au-gr/CVE (b) and TrX100/CVE (c) in PB pH 6.0. Potential scan rate 0.05 Vs<sup>-1</sup> (Au-gr – phytosynthesized gold nanoparticles; TrX100 – non-ionogenic surfactant Triton X-100).

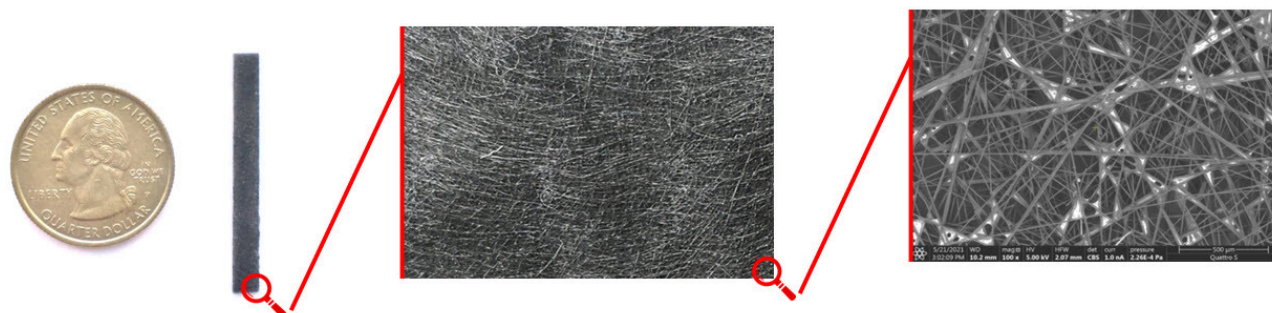

**Figure S2.** Photo of the CVE.

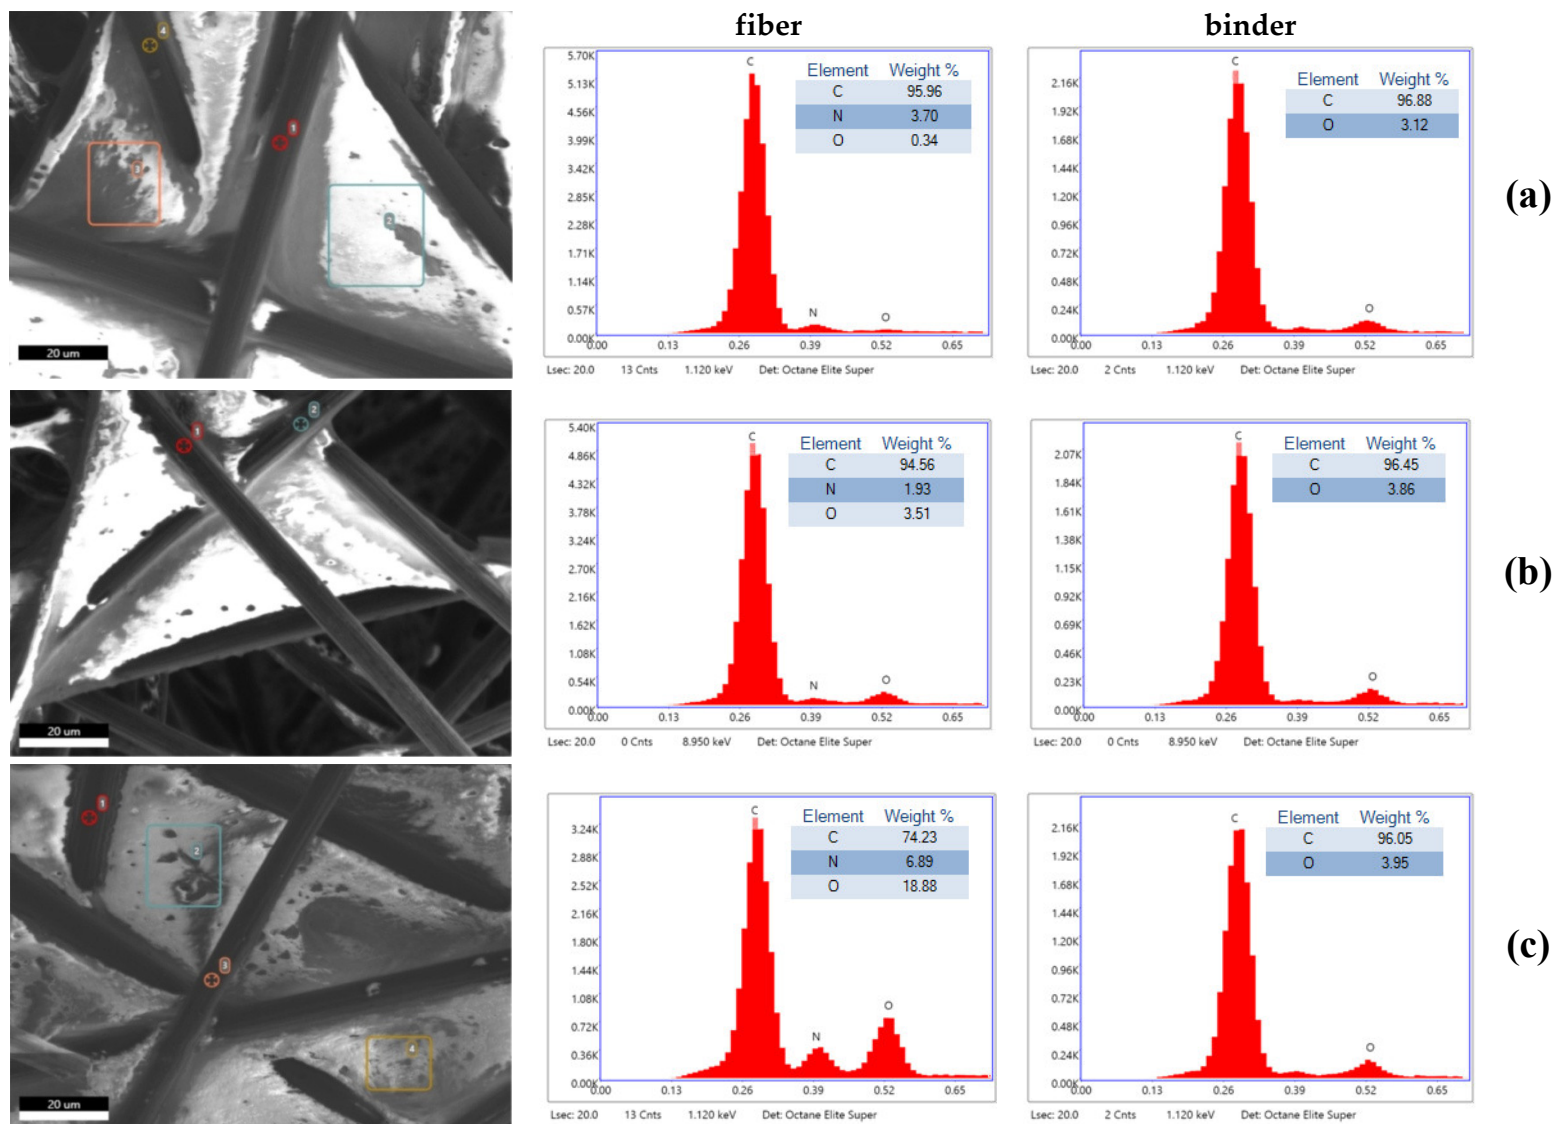

**Figure S3.** SEM-images and EDS spectrum of fiber and binder of the non-activated CVE (a), CVE activated at 1.6 V (b) and at 2.0 V (c). Inserts: element weight contents (%).

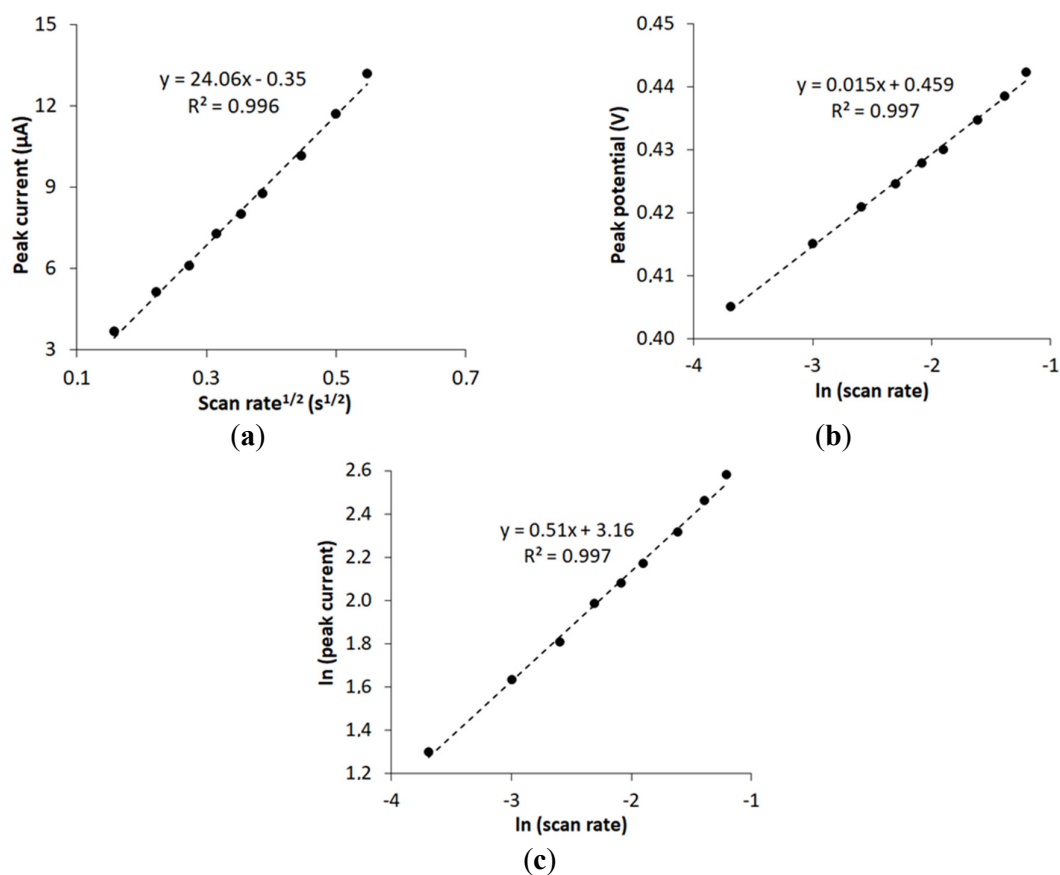

**Figure S4.** Kinetic dependences obtained with the use of  $\text{CVE}_{\text{act}}$  in PB pH 6.0, containing 0.01 mM UA.

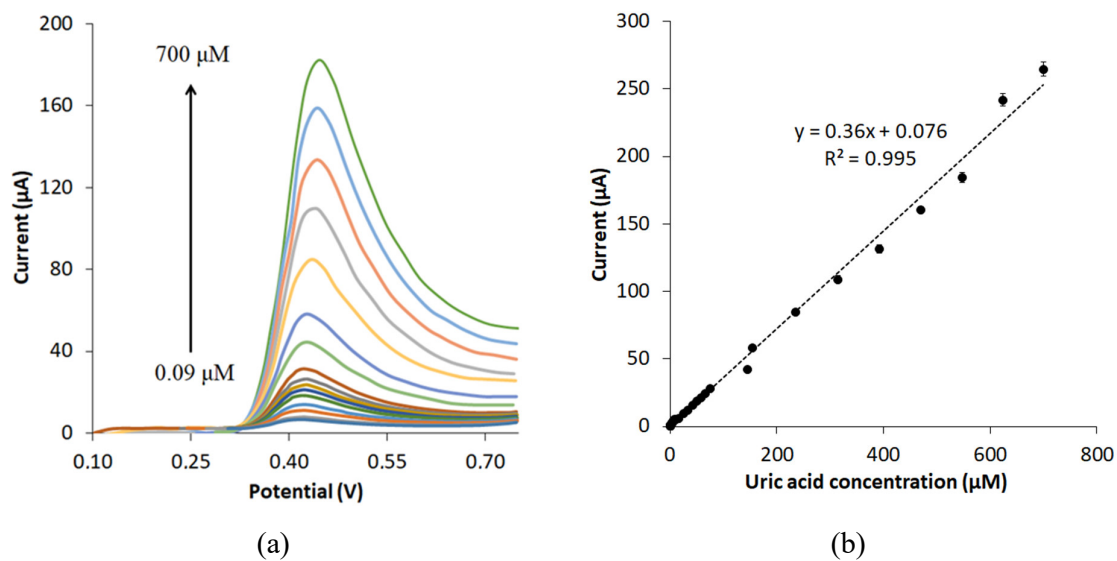

**Figure S5.** LS voltammograms of UA with different concentrations (0.09–700  $\mu\text{M}$ ) on  $\text{CVE}_{\text{act}}$  in PB pH 6.0 at potential scan rate  $0.05 \text{ Vs}^{-1}$  (a) and corresponding dependences  $I_p$  vs. UA concentration (b) ( $n = 3$  for each concentration).

**Table S1.** Interfering influence of some substances on UA determination.

| <b>Interfering Substance</b> | <b>Concentration of Interfering Substance, <math>\mu\text{M}</math></b> | <b>Added UA, <math>\mu\text{M}</math></b> | <b>Found UA, <math>\mu\text{M}</math></b> | <b>R, %</b> |
|------------------------------|-------------------------------------------------------------------------|-------------------------------------------|-------------------------------------------|-------------|
| Creatinine                   | 1000                                                                    | 1                                         | 1.00 $\pm$ 0.09                           | 100         |
| Urea                         | 1000                                                                    | 1                                         | 1.05 $\pm$ 0.10                           | 105         |
| Glucose                      | 1000                                                                    | 1                                         | 1.07 $\pm$ 0.08                           | 107         |
| Ascorbic acid                | 10                                                                      | 1                                         | 0.96 $\pm$ 0.11                           | 96          |
